# Supplementary material for: 16S Long-Read Metabarcoding in Field Conditions Uncovers Compost-Driven Modulation of Rhizosphere Bacterial Communities During Red Bell Pepper Development
Source: Research Square preprint supplement (doi:10.21203/rs.3.rs-7800711/v1), 2025-10-25
Supplement: Supplementary file 1 [file 654a1b2273ebbb6e49c879df.docx]

**Supplementary Material**

**16S Long-Read Metabarcoding in Field Conditions Uncovers Compost-Driven Modulation of Rhizosphere Bacterial Communities During Red Bell Pepper Development**

Mateo Córdoba-Agudelo1, Maximilian Schmidt2, Maria Serwetnicka3, Carolyn-Monika Görres4, Jana Zinkernagel3, Davide Francioli1#

1Department of Soil Science and Plant Nutrition, Hochschule Geisenheim University, Geisenheim, Germany

2Department of Plant Breeding, Hochschule Geisenheim University, Geisenheim, Germany

3Department of Vegetable Crops, Hochschule Geisenheim University, Geisenheim, Germany

4Department of Applied Ecology, Hochschule Geisenheim University, Geisenheim, Germany

**#Corresponding author:** Davide Francioli davide.francioli@hs-gm.de

**Keywords**: Compost placement, Rhizosphere microbiome, Nanopore long-read sequencing, Nitrogen cycling, *Capsicum annuum*

**Figure S1.** Accumulation curve of Consensus Cluster Sequences (CSCs) across samples. The curve shows the cumulative richness as the sample size increases, with plateauing indicating sufficient coverage of the bacterial community.

**
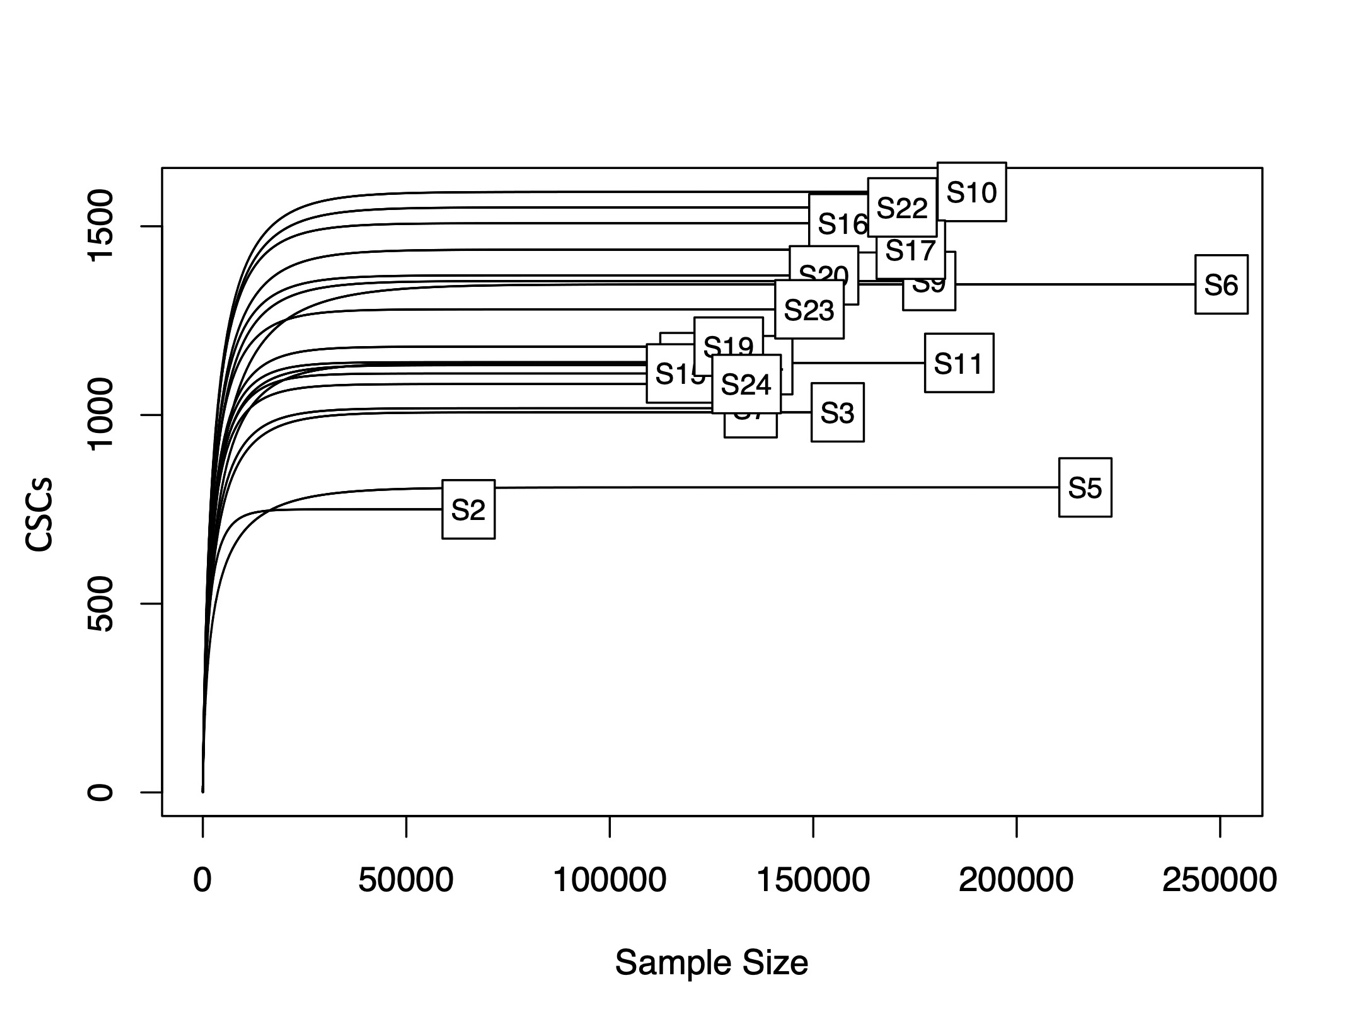
**

**Table S1**. Chemical properties of the green compost used in the study. The compost was analyzed by PLANCO-TEC GmbH, 37249 Neu-Eichenberg, Germany.

| **Fresh mass properties** | **Value** |
| --- | --- |
| Total nitrogen | 8.8 kg/t |
| Soluble nitrogen in CaCl2 | 0.74 kg/t |
| Organic Nitrogen | 8.06 kg/t |
| Total phosphate (P2O5) | 4.43 kg/t |
| Total potassium oxide (K20) | 9.8 kg/t |
| Saturaded magnesium oxide (MgO) | 5.55 kg/t |
| Alkaline substances (CaO) | 37.25 kg/t |
| pH | 8.8 kg/t |
| Salinity | 4.03 g/l |
| C/N ratio | 15 |
| Organic matter | 223 kg/t |
| Humus-C | 56 kg/t |
|  |  |
| **Dry mass properties** |  |
| Organic matter (GV 450ºC) | 35.80 % |
| Basic active components (CaO) | 5.97 % |
|  |  |
| **Physical parameters** |  |
| Bulk density | 550 g/l |
| water content (dry mass) | 37.60 % |
| Salt content (Extr. 1:5, dry mass) | 4.03 g/l |
|  |  |
| **Plant nutrients** |  |
| Total nitrogen (N) | 1.41 % dry mass |
| Total phosphate (P2O5) | 0.71 % dry mass |
| Total potassium oxide (K2O) | 1.57 % dry mass |
| Total magnesium oxide (MgO) | 0.89 % dry mass |
| Soluble ammonium CaCl2 (NH4-N) | 407 mg/l dry mass |
|  |  |
| **Heavy metals** |  |
| Pb | 19 mg/kg dry mass |
| Cd | 0.26 mg/kg dry mass |
| Cr | 22.5 mg/kg dry mass |
| Cu | 29.4 mg/kg dry mass |
| Ni | 13.7 mg/kg dry mass |
| Hg | 0.06 mg/kg dry mass |
| Zn | 147 mg/kg dry mass |

**Table S2.** Summary of high-quality bacterial 16S rRNA reads obtained per sample before and after quality filtering and denoising. Samples are grouped by treatment (Control, Broadcast, Deep-banding) and plant developmental stage (Maturation, Ripening).

| **Treatment** | **PGS** | **Sample ID** | **16S rRNA reads** | **16S rRNA reads after filtering** |
| --- | --- | --- | --- | --- |
| Control | Maturation | S10 | 203,283 | 188,988 |
| Control | Maturation | S9 | 195,127 | 178,504 |
| Control | Maturation | S11 | 204,816 | 185,902 |
| Broadcast | Maturation | S3 | 179,257 | 156,023 |
| Broadcast | Maturation | S2 | 81,568 | 65,312 |
| Broadcast | Maturation | S4 | 160,033 | 138,467 |
| Deep-banding | Maturation | S5 | 228,106 | 216,889 |
| Deep-banding | Maturation | S6 | 265,719 | 250,360 |
| Deep-banding | Maturation | S7 | 151,958 | 134,640 |
| Broadcast | Ripening | S15 | 134,298 | 117,522 |
| Broadcast | Ripening | S14 | 135,593 | 120,829 |
| Broadcast | Ripening | S16 | 170,559 | 157,424 |
| Deep-banding | Ripening | S17 | 190,723 | 173,983 |
| Deep-banding | Ripening | S19 | 149,526 | 129,242 |
| Deep-banding | Ripening | S20 | 165,824 | 152,653 |
| Control | Ripening | S22 | 184,843 | 171,922 |
| Control | Ripening | S23 | 159,362 | 149,078 |
| Control | Ripening | S24 | 156,439 | 133,616 |
